# Supplementary material
Source: publisher figshare collection journal article supplement (https://acs.figshare.com/ndownloader/files/7394086)
Supplement: Supplementary file 1 [file 7394086]

## SUPPORTING INFORMATION

### Crystalline Cobalt Oxide Films for Sustained Electrocatalytic Oxygen Evolution under Strongly Acidic Conditions

Jared S. Mondschein,<sup>‡</sup> Juan F. Callejas,<sup>‡</sup> Carlos G. Read, Jamie Y. C. Chen, Cameron F. Holder, Catherine K. Badding, and Raymond E. Schaak\*

*Department of Chemistry and Materials Research Institute, The Pennsylvania State University, University Park, PA 16802*

<sup>‡</sup> These authors contributed equally.  
E-mail: res20@psu.edu

#### Calculation estimating the amount of O<sub>2</sub> released through dissolution of Co<sub>3</sub>O<sub>4</sub>

Molar Mass of Co: 58.9332 g/mol

Density: 8.90 g/cm<sup>3</sup>

Thickness of deposited Co film: 150 nm

Area of Electrode: 1 cm<sup>2</sup>

Volume of deposited Co film:

$$150 \text{ nm} \times \frac{1 \times 10^{-7} \text{ cm}}{\text{nm}} \times 1 \text{ cm}^2 = 1.5 \times 10^{-5} \text{ cm}^3$$

Loading density of Co deposited:

$$\frac{1.5 \times 10^{-5} \text{ cm}^3}{\text{cm}^2} \times \frac{8.90 \text{ g}}{\text{cm}^3} \times \frac{1000 \text{ mg}}{\text{g}} = 0.1335 \frac{\text{mg}}{\text{cm}^2}$$

Loading density of Co<sub>3</sub>O<sub>4</sub> deposited:

$$\begin{aligned} & \frac{0.1335 \text{ mg Co}}{\text{cm}^2} \times \frac{\text{g Co}}{1000 \text{ mg Co}} \times \frac{\text{mol Co}}{58.9332 \text{ g Co}} \times \frac{1 \text{ mol Co}_3\text{O}_4}{3 \text{ mol Co}} \times \frac{240.8 \text{ g Co}_3\text{O}_4}{1 \text{ mol Co}_3\text{O}_4} \times \frac{1000 \text{ mg Co}_3\text{O}_4}{1 \text{ g Co}_3\text{O}_4} \\ &= 0.182 \frac{\text{mg Co}_3\text{O}_4}{\text{cm}^2} \end{aligned}$$

Moles of O<sub>2</sub> from Co<sub>3</sub>O<sub>4</sub>:

$$\frac{0.182 \text{ mg Co}_3\text{O}_4}{\text{cm}^2} \times \frac{\text{mmol Co}_3\text{O}_4}{240.8 \text{ mg Co}_3\text{O}_4} \times \frac{2 \text{ mmol O}_2}{1 \text{ mmol Co}_3\text{O}_4} \times \frac{1 \text{ mol O}_2}{1000 \text{ mmol O}_2} \times 1 \text{ cm}^2 = 1.51 \times 10^{-6} \text{ mol O}_2$$

Volume of O<sub>2</sub> produced from dissolution of Co<sub>3</sub>O<sub>4</sub>:

$$\frac{1.51 \times 10^{-6} \text{ mol O}_2 \times 0.0826 \frac{\text{atm} \cdot \text{L}}{\text{mol} \cdot \text{K}} \times 298 \text{ K}}{1 \text{ atm}} \times \frac{1000 \text{ mL}}{1 \text{ L}} = 0.037 \text{ mL of O}_2$$

Before complete dissolution of the 300-nm Co<sub>3</sub>O<sub>4</sub> film, 6.12 moles of O<sub>2</sub> can be produced per gram of Co<sub>3</sub>O<sub>4</sub> and  $1.47 \times 10^3$  moles of O<sub>2</sub> can be produced per mole of Co<sub>3</sub>O<sub>4</sub>.

## Supplementary Figures

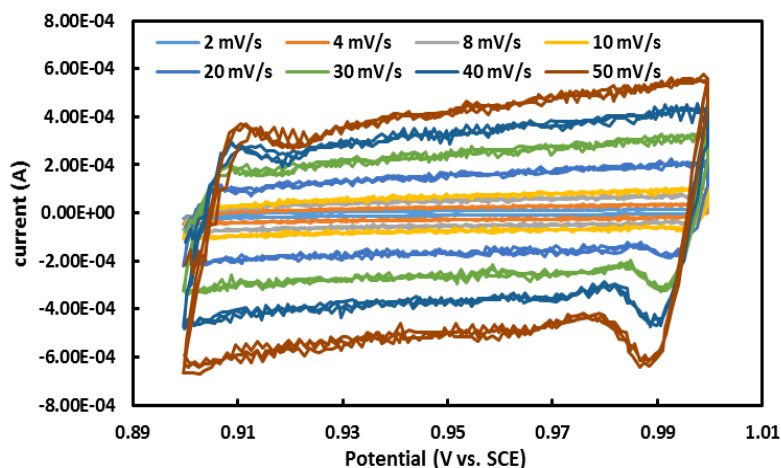

**Figure S1.** Cyclic voltammograms at different scan rates collected after 2 hours of electrolysis at  $10 \text{ mA/cm}^2$  of a representative sample: the  $\text{Co}_3\text{O}_4$  nanoparticle film that was prepared by annealing colloiddally synthesized Co nanoparticles.

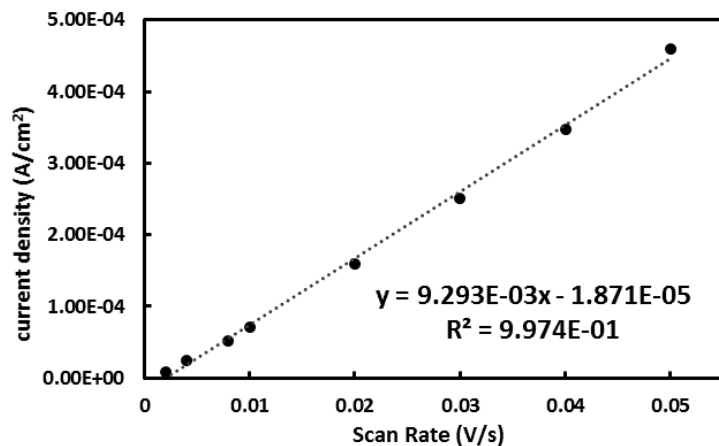

**Figure S2.**  $j - v$  plot of a  $1 \text{ cm}^2$   $\text{Co}_3\text{O}_4$  nanoparticle film that was prepared from annealing Co nanoparticles. The slope of the plot ( $9.293 \text{ mF/cm}^2$ ) gives the capacitance of the catalyst film. When divided by the capacitance of bare FTO ( $0.008 \text{ mF/cm}^2$ ), the result can be interpreted as the  $\text{Co}_3\text{O}_4$  nanoparticle film being 1162 times rougher than bare FTO.

EDS data (Figure S3) indicate that no noble metal contaminants, including Ir and Ru, are present. High-resolution X-ray photoelectron spectra of the Ir 4d and Ru 3p regions are consistent with the EDS data, revealing no signal above baseline (Figure S4). Additionally, the XPS data are consistent with the formation of  $\text{Co}_3\text{O}_4$  and also reveal that minor residual sulfur contaminants are present on all surfaces, including the bare FTO substrate. Time-of-flight secondary ion mass spectrometry (TOF-SIMS), which is typically considered to have a higher elemental sensitivity than XPS and EDS,<sup>1</sup> also indicates that Ir and Ru are not present.

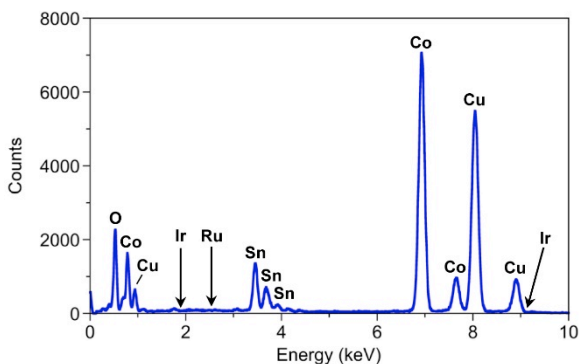

**Figure S3.** EDS spectrum of a  $\text{Co}_3\text{O}_4/\text{FTO}$  electrode showing the presence of oxygen, cobalt, and tin. No peaks corresponding to iridium or ruthenium were observed. The copper signal is from the copper TEM grid.

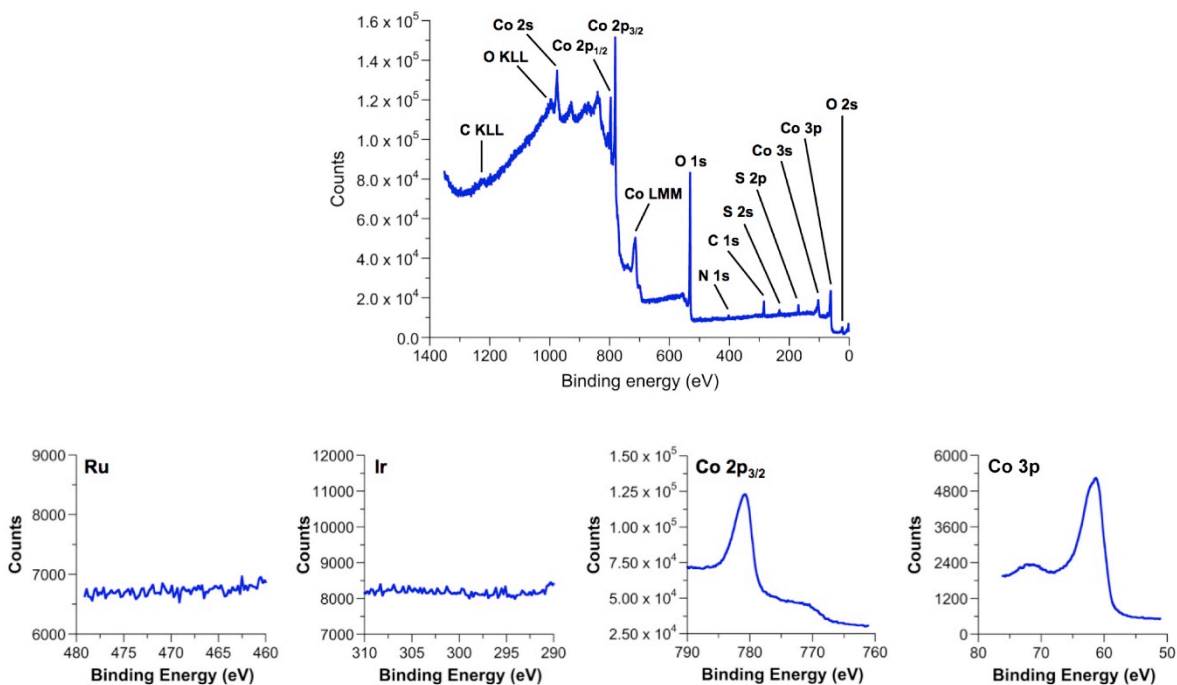

**Figure S4.** XPS spectra of a  $\text{Co}_3\text{O}_4/\text{FTO}$  electrode: (top) Survey scan showing the spectra obtained before electrochemical testing. (bottom) High-resolution scans of the Ru 3p, Ir 4d, Co 2p, and Co 3p regions.

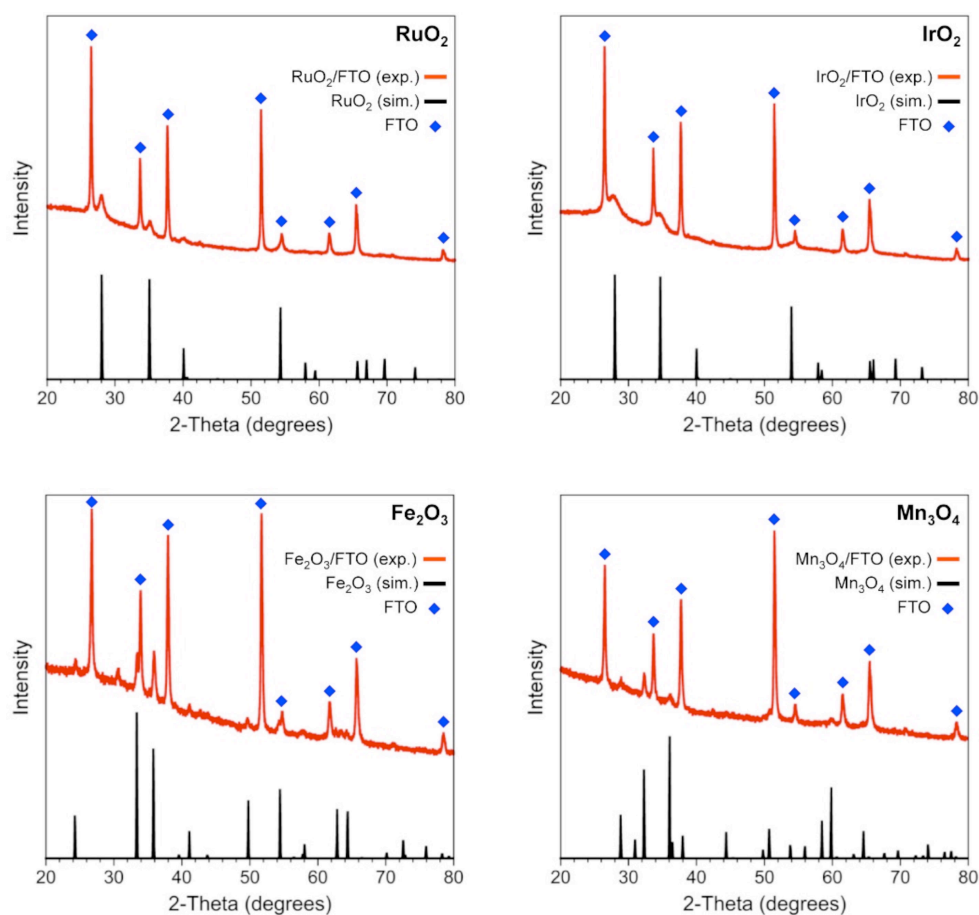

**Figure S5.** XRD patterns corresponding to the RuO<sub>2</sub>/FTO, IrO<sub>2</sub>/FTO, Fe<sub>2</sub>O<sub>3</sub>/FTO, and Mn<sub>3</sub>O<sub>4</sub>/FTO electrodes used for benchmarking and comparison.

**Table S1.** Summary of relative roughness of three different Co<sub>3</sub>O<sub>4</sub> catalyst films collected at 2, 4, and 8 hours during a 10 mA/cm<sup>2</sup> electrolysis experiment.

|             | 150 nm Co <sub>3</sub> O <sub>4</sub> Film | Co <sub>3</sub> O <sub>4</sub> nanoparticle Film | Bulk Co <sub>3</sub> O <sub>4</sub> Film |
|-------------|--------------------------------------------|--------------------------------------------------|------------------------------------------|
| <b>0 hr</b> | 4                                          | 728                                              | 38                                       |
| <b>2 hr</b> | 15                                         | 1153                                             | 100                                      |
| <b>4 hr</b> | 19                                         | 1204                                             | 109                                      |
| <b>8hr</b>  | 14                                         | 1185                                             | 147                                      |

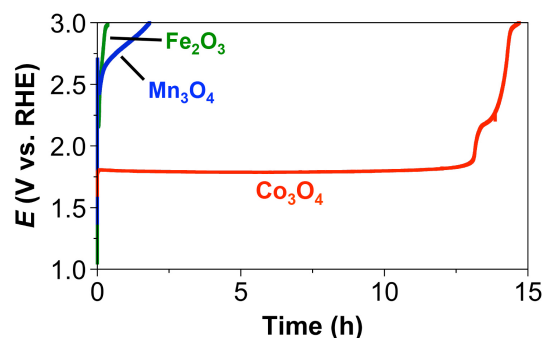

**Figure S6.** Galvanostatic measurements at 10 mA/cm<sup>2</sup> for Co<sub>3</sub>O<sub>4</sub>/FTO from Figure 5B extended out to 15 h to show the electrode's failure after complete film dissolution. The iron and manganese analogues, which dissolve rapidly, are also shown for comparison.

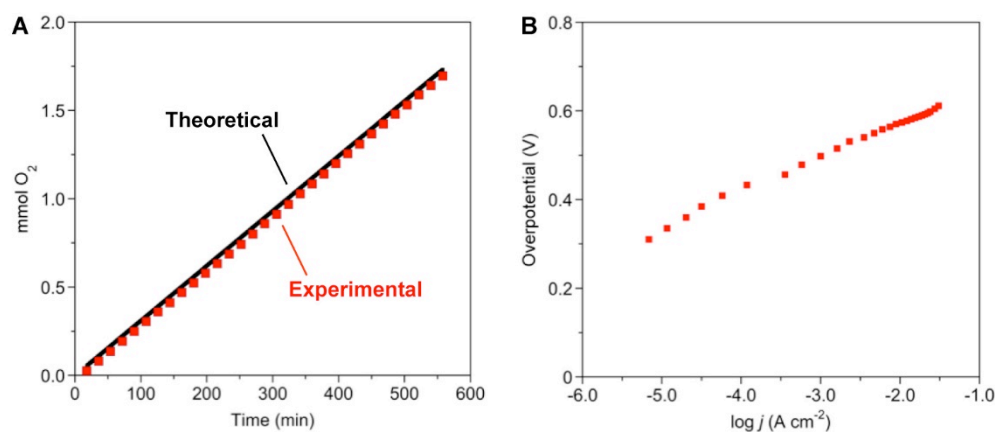

**Figure S7.** (A) Faradaic yield and (B) Tafel plot of a Co<sub>3</sub>O<sub>4</sub>/FTO electrode.

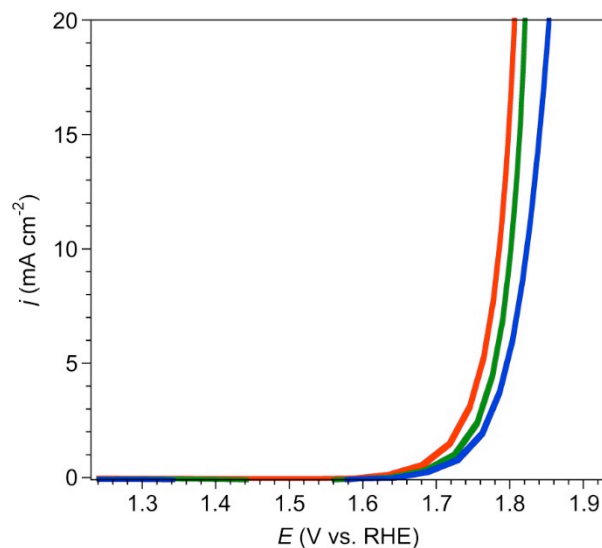

**Figure S8.** Plot of current density vs. potential for Co<sub>3</sub>O<sub>4</sub>/FTO electrodes in 0.5 M H<sub>2</sub>SO<sub>4</sub> initially (red) and also after 100 (green) and 500 (blue) CV sweeps between 1.86 and 1.24 V vs. RHE.

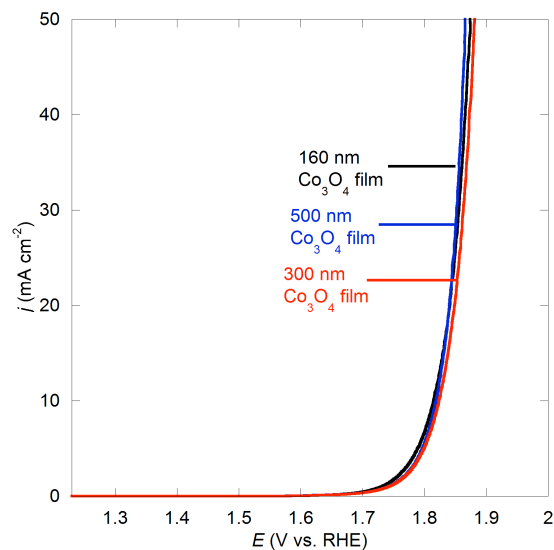

**Figure S9.** Linear sweep voltammograms of 160-500 nm thick  $\text{Co}_3\text{O}_4$  films in 0.5 M  $\text{H}_2\text{SO}_4$ .

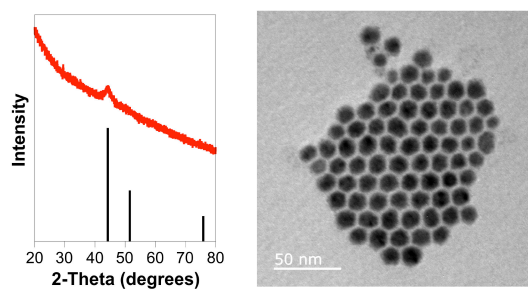

**Figure S10.** Powder XRD pattern (top: experimental, bottom: simulated) and TEM image for the colloidal Co nanoparticles.

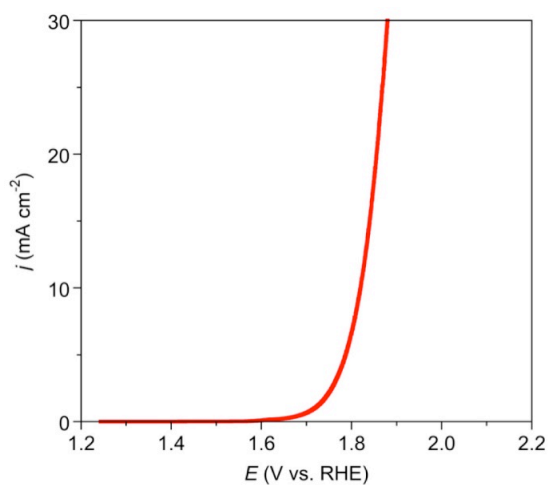

**Figure S11.** Linear sweep voltammogram of a  $\text{Co}_3\text{O}_4/\text{Au}/\text{FTO}$  electrode showing similar activity to a  $\text{Co}_3\text{O}_4/\text{FTO}$  electrode. The  $\text{Co}_3\text{O}_4/\text{Au}/\text{FTO}$  electrode was prepared by first depositing a  $\sim 150$ -nm Au film on FTO, then depositing a  $\sim 150$ -nm Co film on top of the Au, then oxidizing Co to  $\text{Co}_3\text{O}_4$  by heating to  $400^\circ\text{C}$  for 2 h.

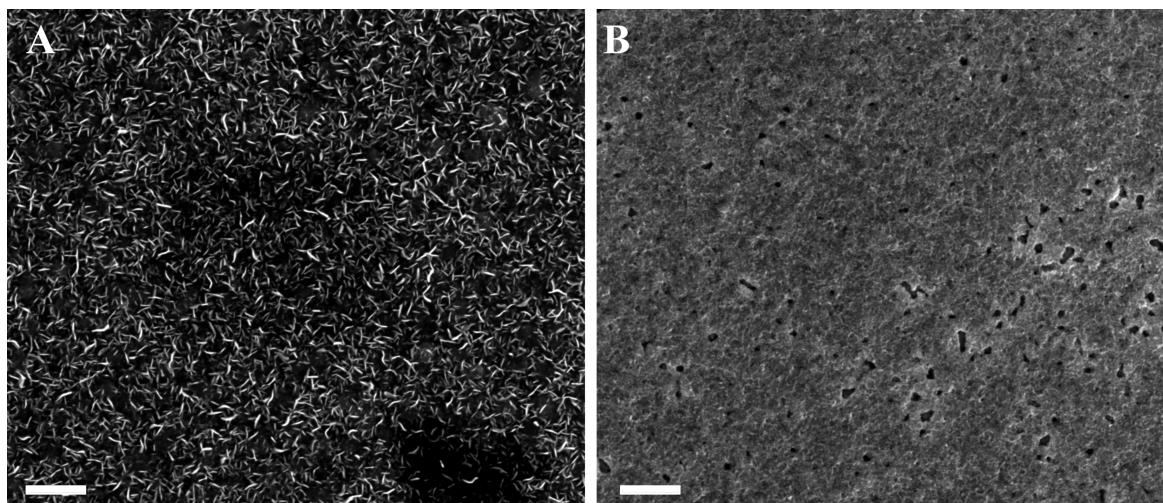

**Figure S12.** Scanning electron micrographs of a 300 nm  $\text{Co}_3\text{O}_4$  film held galvanostatically at 10  $\text{mA}/\text{cm}^2$  in 0.5 M  $\text{H}_2\text{SO}_4$  after (A) 10 minutes and (B) 4 hours. Scale bar is 1  $\mu\text{m}$ .

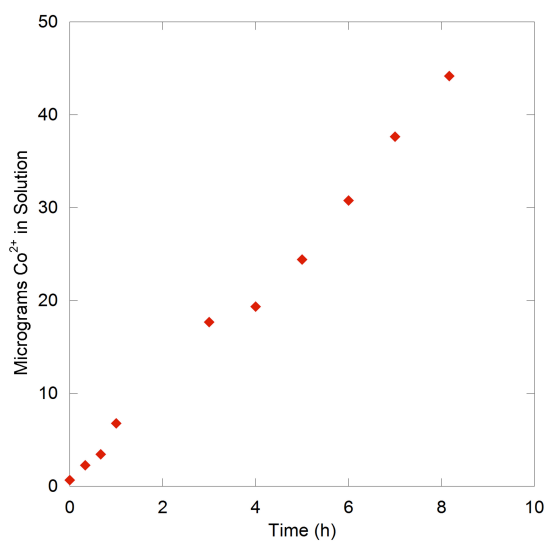

**Figure S13.** Time-dependent dissolution data of a 160 nm  $\text{Co}_3\text{O}_4$  film.

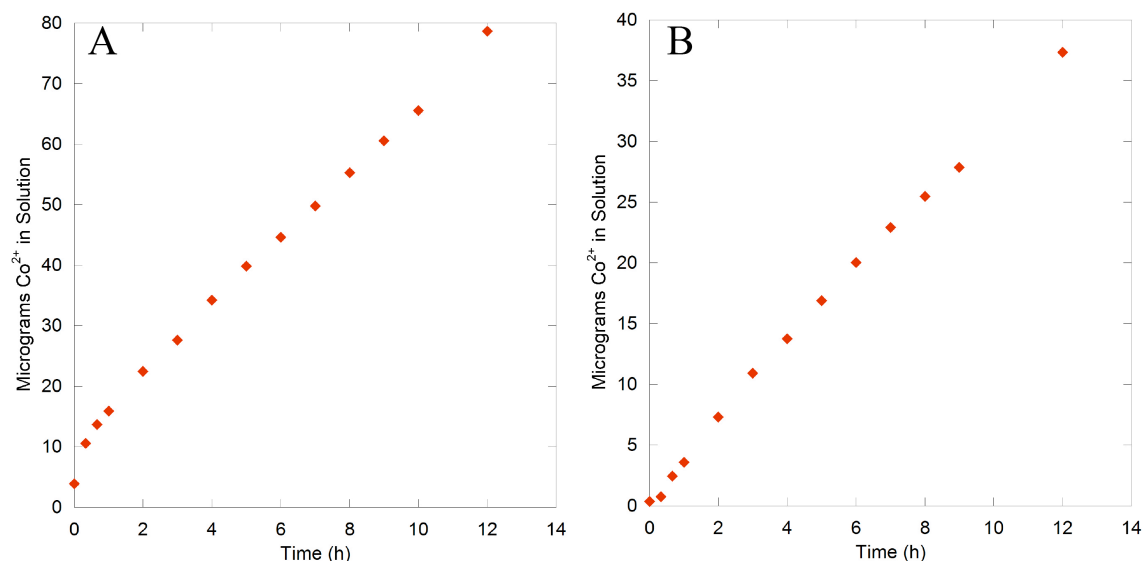

**Figure S14.** Time-dependent dissolution data of a 300 nm  $\text{Co}_3\text{O}_4$  film held galvanostatically at 10  $\text{mA}/\text{cm}^2$  in (A) pH 1 and (B) pH 2 electrolyte.

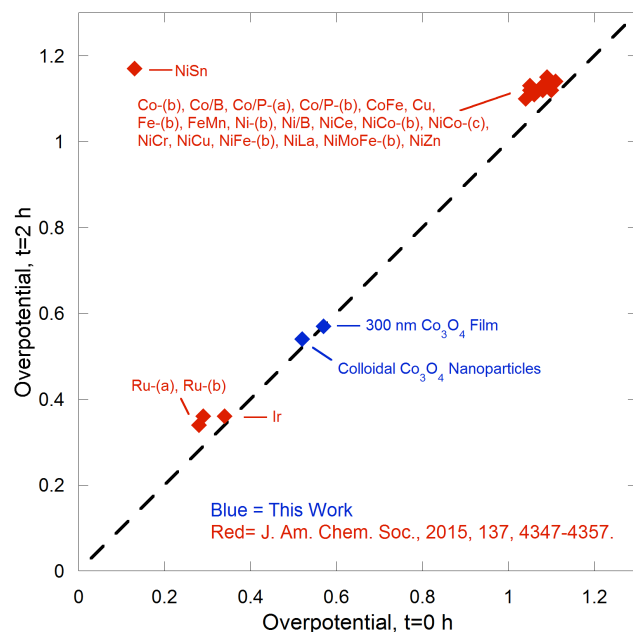

**Figure S15.** Plot overpotential at 2 h vs initial overpotential for the  $\text{Co}/\text{FTO} \rightarrow \text{Co}_3\text{O}_4/\text{FTO}$  nanoparticle and film electrodes reported in this manuscript, along with OER catalysts reported in a recent benchmarking paper (ref. 28 of the main manuscript), in 0.5 M  $\text{H}_2\text{SO}_4$ . This plot shows how the  $\text{Co}_3\text{O}_4/\text{FTO}$  electrodes compare to other reported OER catalysts and also their short-term stability after 2 h of operation.

## Reference

- [1] Benninghoven, A. Chemical Analysis of Inorganic and Organic Surfaces and Thin Films by Static Time-of-Flight Secondary Ion Mass Spectrometry (TOF-SIMS). *Angew. Chem., Int. Ed.* **1994**, 33, 1023-1043.
